# Supplementary material for: Patterns and socio-demographic correlates of domain-specific physical activities and their associations with adiposity in the China Kadoorie Biobank study
Source: PubMed Central journal article supplement (PMC4138397; doi:10.1186/1471-2458-14-826), 2014-08-09

**A. Men**

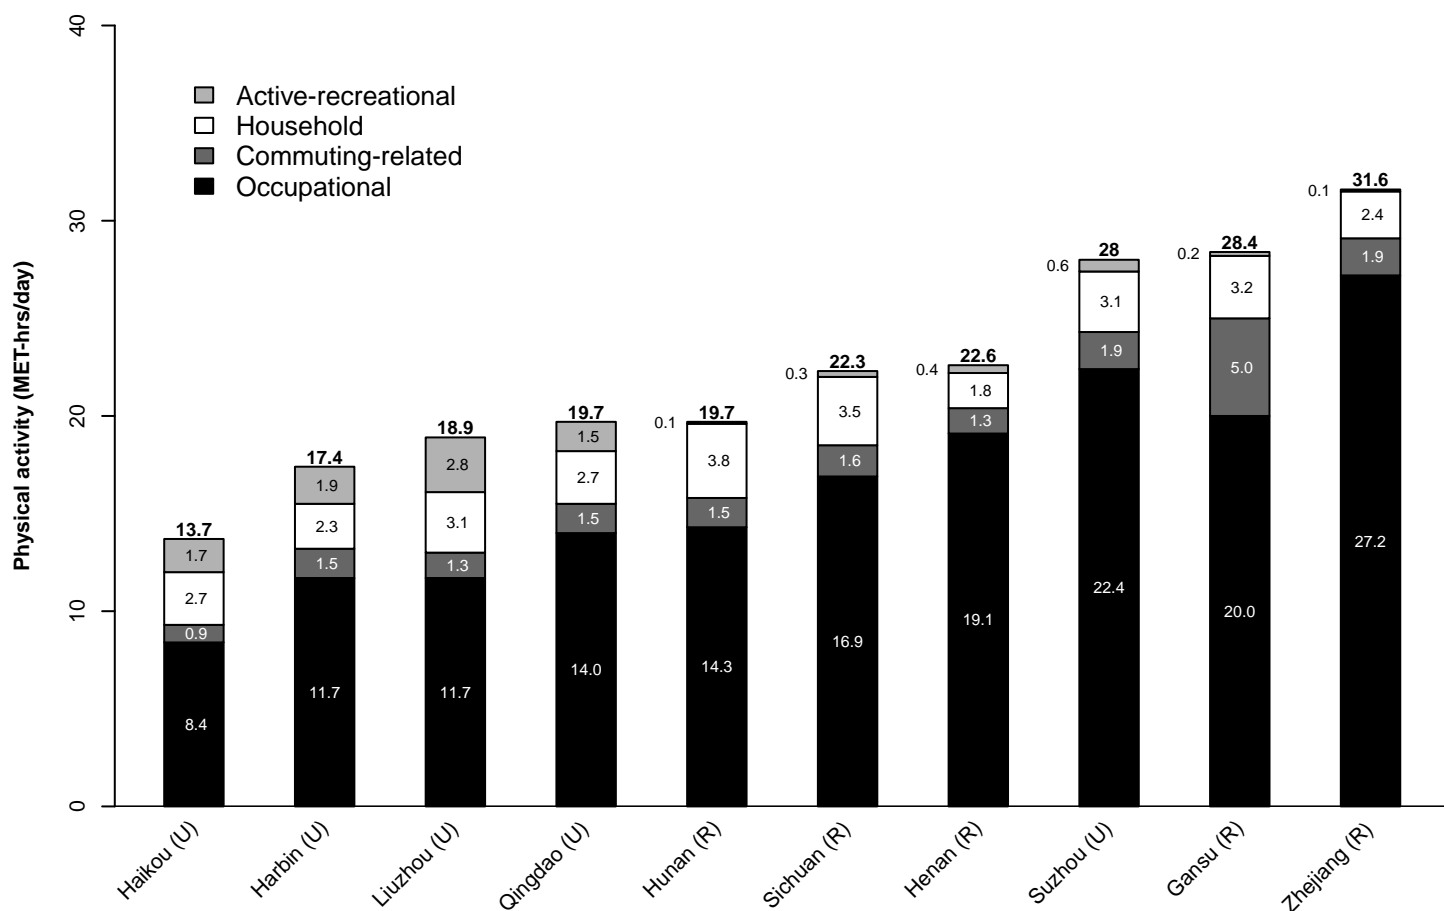

**B. Women**

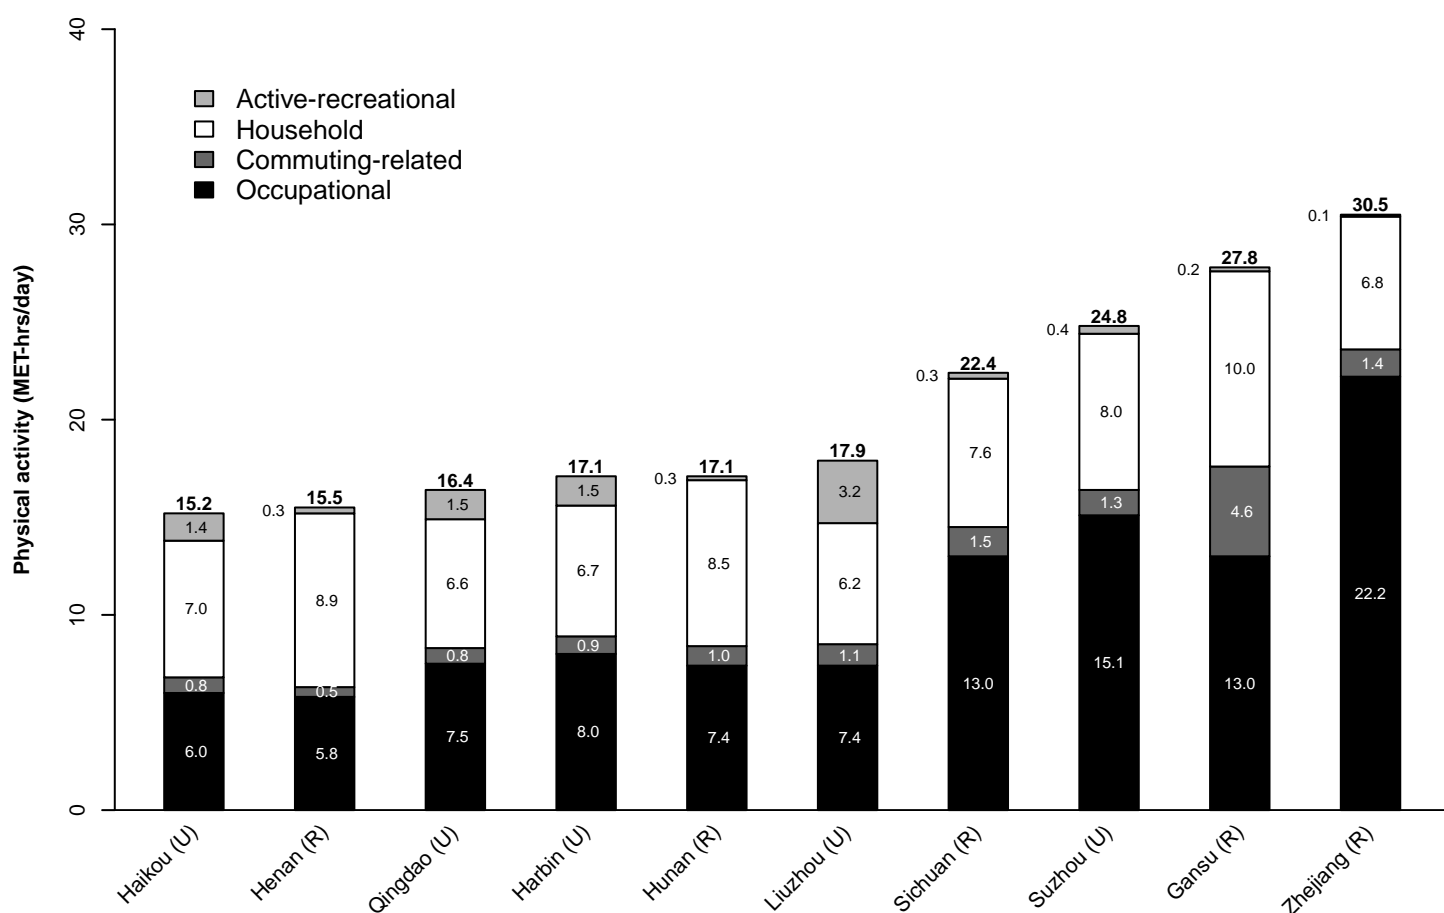

Supplement: 12889_2014_6953_MOESM1_ESM.pdf [file 12889_2014_6953_MOESM1_ESM.pdf]
