# Supplementary material for: Patterns and socio-demographic correlates of domain-specific physical activities and their associations with adiposity in the China Kadoorie Biobank study
Source: PubMed Central journal article supplement (PMC4138397; doi:10.1186/1471-2458-14-826), 2014-08-09
Supplement: 12889_2014_6953_MOESM2_ESM.pdf [file 12889_2014_6953_MOESM2_ESM.pdf]

## Additional file 2: Figure S2. Associations of commuting-related and household activity with BMI, waist circumference and percentage body fat in men with no history of major disease

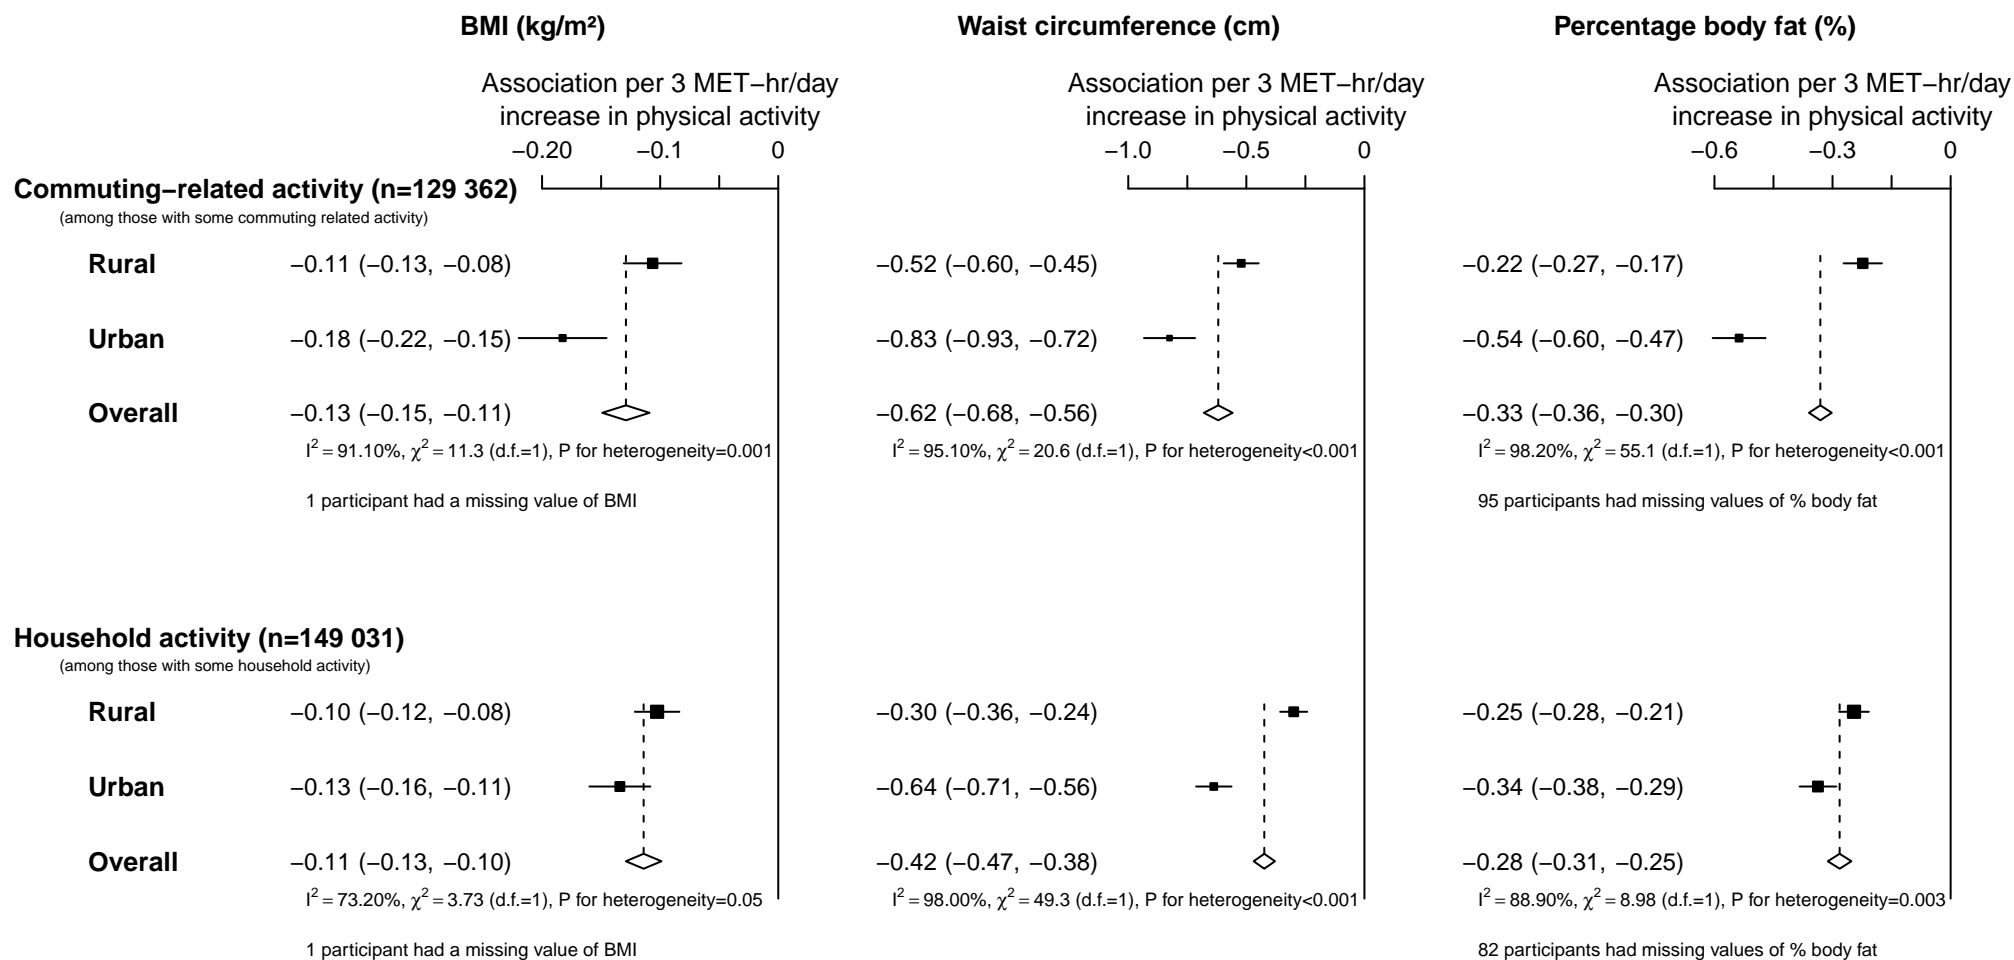

Associations were expressed as the regression coefficients (β) for 3 MET-hr/day

Overall associations were estimated as inverse-variance-weighted averages
