# Supplementary material for: Patterns and socio-demographic correlates of domain-specific physical activities and their associations with adiposity in the China Kadoorie Biobank study
Source: PubMed Central journal article supplement (PMC4138397; doi:10.1186/1471-2458-14-826), 2014-08-09
Supplement: 12889_2014_6953_MOESM3_ESM.pdf [file 12889_2014_6953_MOESM3_ESM.pdf]

**Additional file 3: Figure S3. Association of household activity with BMI, waist circumference and percentage body fat in 276 078 women with no history of major disease**

**A. BMI (kg/m<sup>2</sup>)**

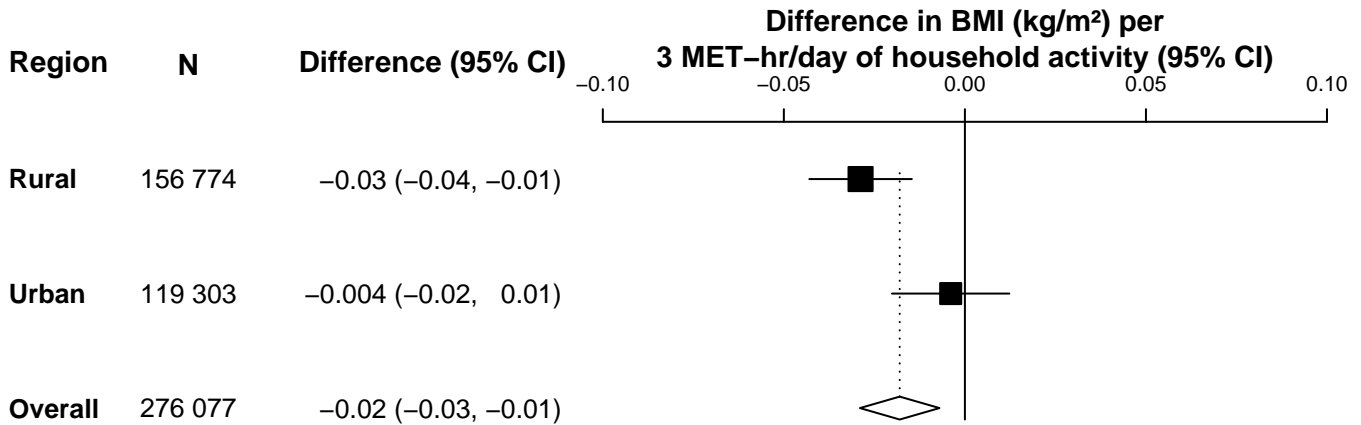

$I^2 = 80.5\%$ ,  $\chi^2 = 5.14$  (d.f.=1), P for heterogeneity=0.023

1 participant had a missing value of BMI

**B. Waist circumference (cm)**

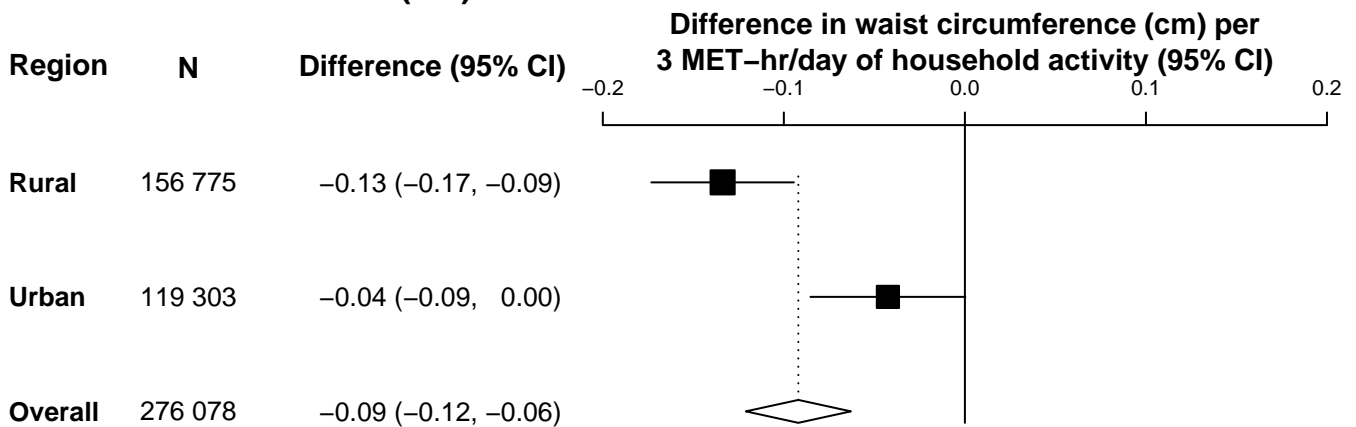

$I^2 = 89.4\%$ ,  $\chi^2 = 9.47$  (d.f.=1), P for heterogeneity=0.002

**C. Percentage body fat**

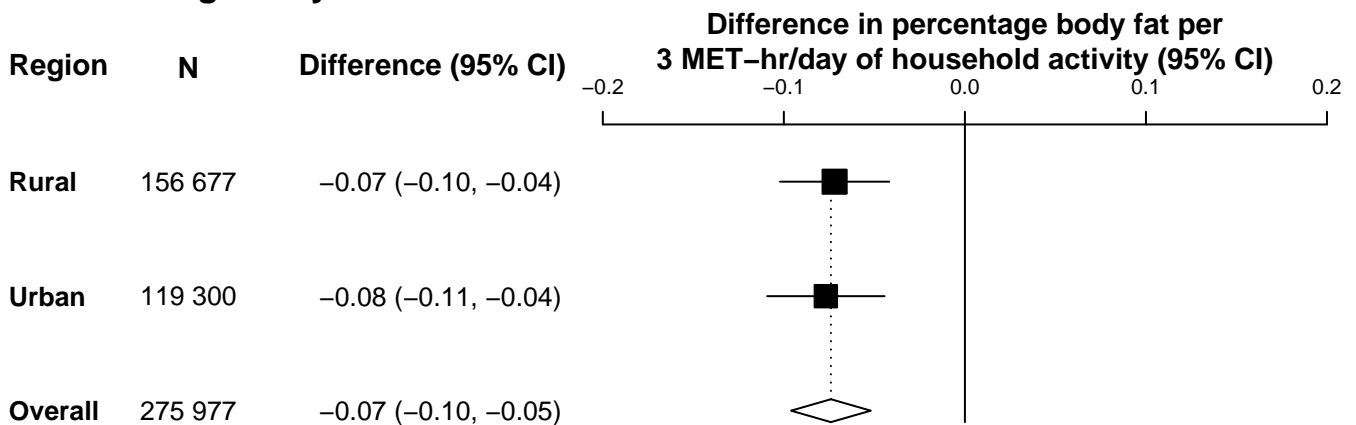

$I^2 = 0.0\%$ ,  $\chi^2 = 0.05$  (d.f.=1), P for heterogeneity=0.83

102 participants had missing values of percentage body fat

**Only those women who have some household activity were included in the analysis**

**Overall associations were estimated as inverse-variance-weighted averages**
